# Supplementary material for: A comprehensive study on hygroscopic behaviour and nitrate depletion of NaNO 3 and dicarboxylic acid mixtures: implications for nitrate depletion in tropospheric aerosols
Source: Copernicus journal article supplement (doi:10.5194/acp-22-10955-2022), 2022-08-29
Supplement: Supplementary file 1 [file acp-22-10955-2022-supplement.pdf]

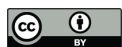

*Supplement of*

**A comprehensive study on hygroscopic behaviour and nitrate depletion of  $\text{NaNO}_3$  and dicarboxylic acid mixtures: implications for nitrate depletion in tropospheric aerosols**

**Shuaishuai Ma et al.**

*Correspondence to:* Shuaishuai Ma (mass@qzc.edu.cn) and Yunhong Zhang (yhz@bit.edu.cn)

The copyright of individual parts of the supplement might differ from the article licence.

## 18 Hygroscopic behaviour and IR features of individual components

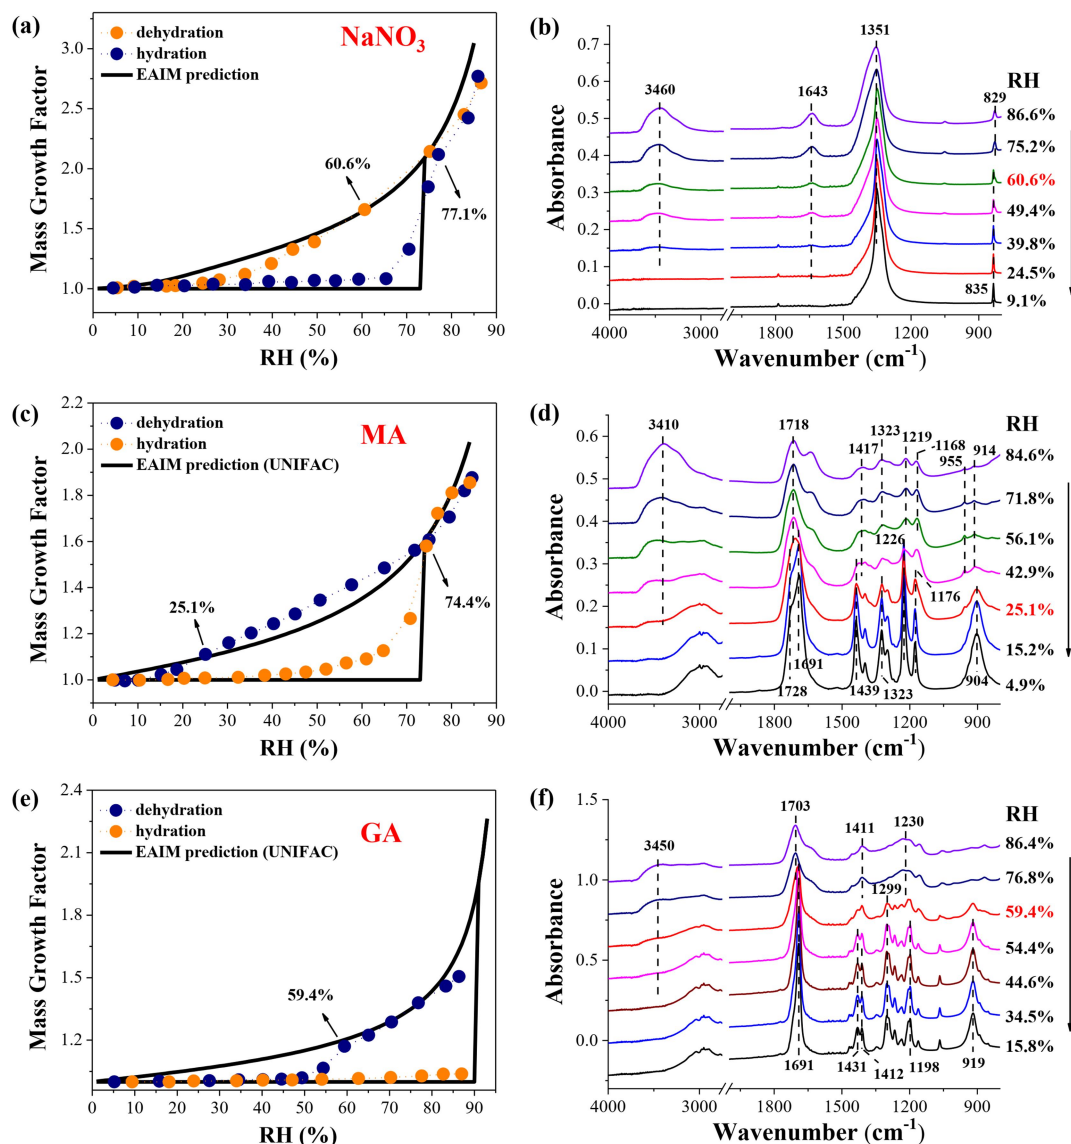

19  
 20 **Figure S1.** Hygroscopic growth curves during a RH cycle for pure NaNO<sub>3</sub> (a), MA (c), and GA (e)  
 21 particles measured by ATR-FTIR and the comparison with EAIM predictions, as well as the IR  
 22 spectra of pure NaNO<sub>3</sub> (b), MA (d), and GA (f) particles upon dehydration.

23 The hygroscopic growth curves of pure NaNO<sub>3</sub>, MA, and GA particles measured  
 24 by ATR-FTIR are shown in Fig. S1a, S1c, and S1e, respectively. Corresponding IR  
 25 spectra during the dehumidification are shown in Fig. S1b, S1d, and S1f, respectively.  
 26 For NaNO<sub>3</sub> particles, the measured initial ERH is ~ 60.6%, considerably consistent

with the measurement value of 62.5% ERH from Zhang et al. (2014). Meanwhile, the 1351  $\text{cm}^{-1}$  band assigned to  $\nu_3(\text{NO}_3^-)$  becomes sharper, and the out-of-plane deformation  $\nu_2(\text{NO}_3^-)$  located at 829  $\text{cm}^{-1}$  red-shifts to 835  $\text{cm}^{-1}$ , indicating the  $\text{NaNO}_3$  solids formation (Zhang et al., 2014; Liu et al., 2008). Furthermore, the hygroscopic growth and IR spectra of deposited  $\text{NaNO}_3$  particles on  $\text{CaF}_2$  substrates are measured by vacuum FTIR method, as shown in Fig. S2. The 1350  $\text{cm}^{-1}$  band assigned to  $\nu_3(\text{NO}_3^-)$  also becomes sharper upon drying. More importantly, the  $\nu_3(\text{NO}_3^-)$  feature bands in the two measurements are inconsistent with the IR feature of  $\text{NaNO}_3$  crystals, i.e., two shoulder peaks centred at 1383 and 1485  $\text{cm}^{-1}$  arising from splitting of the degenerate  $\nu_3$  mode (Liu et al., 2008). This implies that non-crystalline particle morphology is formed after drying. In addition, Liu et al. (2008) also found small amounts of water present within particles after dehydration and the particles absorb water continuously upon hydration, potentially indicating the formation of highly concentrated droplets after drying. In the present study, the 1640  $\text{cm}^{-1}$  band is barely visible after dehydration, and effloresced  $\text{NaNO}_3$  particles do not absorb water until the DRH. Likewise, Tang and Fung (1997) observed that the Raman spectra characteristic of dried  $\text{Sr}(\text{NO}_3)_2$  and  $\text{Ca}(\text{NO}_3)_2$  particles was obviously different from that of anhydrous crystals, indicative of amorphous solids formation. Meanwhile, no sharp decrease in the water content of  $\text{Ca}(\text{NO}_3)_2$  particles was observed during the dehumidification, and the amorphous solids would deliquesce at RH well below the DRH of anhydrous crystals, which were in good agreement with the observations for

NaNO<sub>3</sub> particles in this work. Based on these, the formation of amorphous NaNO<sub>3</sub> solids after dehydration in the two measurements can be inferred here.

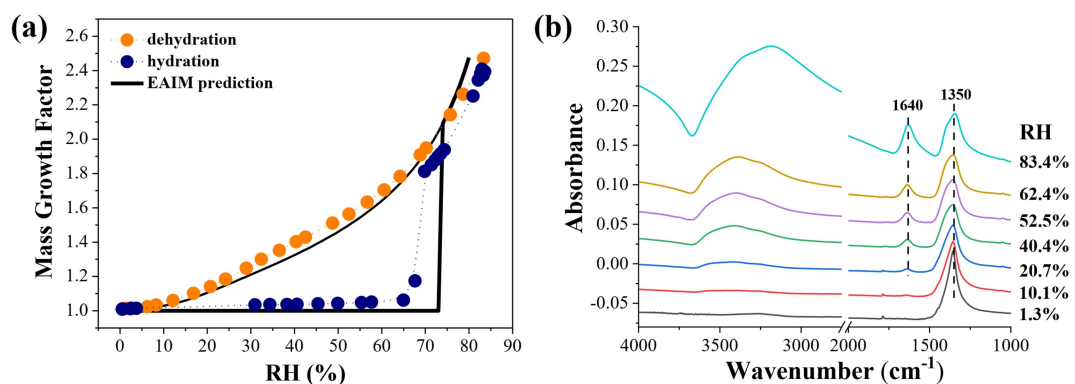

**Figure S2.** Hygroscopic growth curve of pure NaNO<sub>3</sub> particles (a) and corresponding IR spectra upon dehydration (b) measured by vacuum FTIR.

The OA droplets can be effloresced at RH as high as 90% induced by the Ge substrate, and OA crystals cannot be deliquesced due to the DRH higher than 90% (Ma et al., 2013; Wang et al., 2017). Thus, the water cycle curve of OA is not presented here, and only the IR spectra during the dehumidification are shown in Fig. S3. At RH > 90%, the 1744 cm<sup>-1</sup> band is assigned to the stretching mode of C=O ( $\nu(\text{C=O})$ ) of liquid OA, and the 1355 cm<sup>-1</sup> and 1233 cm<sup>-1</sup> bands can be attributed to the bending mode of C-O-H ( $\delta(\text{C-O-H})$ ) and the stretching mode of C-O ( $\nu(\text{C-O})$ ), respectively (Stace and Oralratmanee, 1973; Redington and Redington, 1978). Then at ~ 60% RH, the shoulder peaks at 3441 and 3404 cm<sup>-1</sup> are assigned to  $\nu(\text{OH})$  of OA dihydrate, and the peak at 1680 cm<sup>-1</sup> is attributed to  $\nu(\text{C=O})$  of OA dihydrate, consistent with the reference spectrum from Chemistry WebBook of National Institute of Standards and Technology (NIST) of U.S.A. (blue curve in Fig. S3). As RH decreases to 10%, the 1680 cm<sup>-1</sup> band becomes stronger and the 1744 cm<sup>-1</sup> band becomes weaker, indicating the continuous transformation of liquid OA to OA

67 dihydrate. A new sharp peak at  $1722\text{ cm}^{-1}$  appears at  $\sim 5\%$  RH, suggesting the  
 68 crystalline water loss of OA dihydrate and the formation of anhydrous OA (Wang et  
 69 al., 2019). This RH point agrees well with the measurement value from Wang et al.  
 70 (2017). At  $\sim 3\%$  RH, the OA dihydrate is consumed completely.

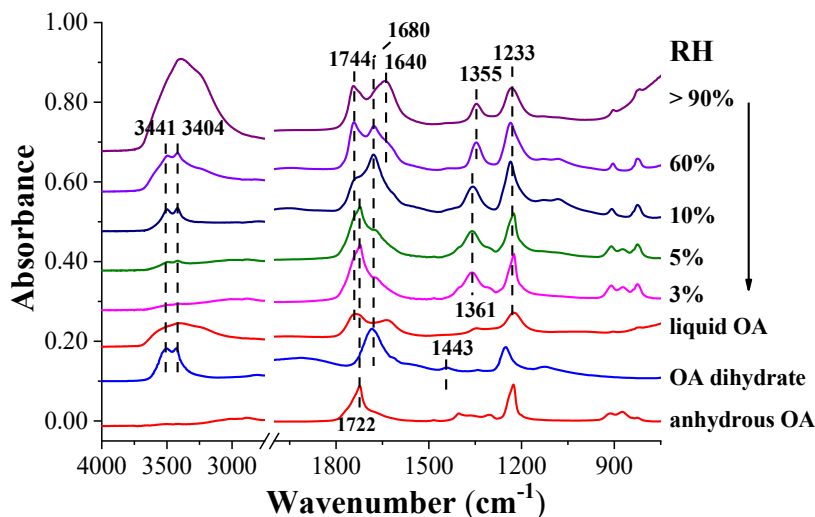

71  
 72 **Figure S3.** IR spectra of pure OA particles during the dehumidification measured by ATR-FTIR.  
 73 Red curves represent the reference spectra of liquid and anhydrous OA from Wang et al. (2019).  
 74 Blue curve indicates the reference spectrum of OA dihydrate from Chemistry WebBook of NIST  
 75 of U.S.A.

76 For MA aerosols, the initial ERH is  $\sim 25.1\%$  and the DRH is  $\sim 74.4\%$ ,  
 77 comparable with the measurement values from Shao et al. (2018). As shown in Fig.  
 78 S1d, the  $1718\text{ cm}^{-1}$  band is assigned to  $\nu(\text{C}=\text{O})$  of aqueous MA. After crystallization,  
 79 the shoulder peaks at  $1728$  and  $1691\text{ cm}^{-1}$  are characteristics of  $\nu(\text{C}=\text{O})$  of crystalline  
 80 MA, and the  $1439\text{ cm}^{-1}$ ,  $1226\text{ cm}^{-1}$  and  $1176\text{ cm}^{-1}$  bands are also assigned to IR  
 81 features of MA solid phase (Shao et al., 2018). Pure GA particles deposited on Ge  
 82 substrate tend to nucleate heterogeneously at  $\sim 59.4\%$  RH, and cannot be deliquesced  
 83 at RH up to  $\sim 86\%$  due to the very high DRH of GA (Marcolli et al., 2004; Yeung et

84 al., 2010; Peng et al., 2001; Pope et al., 2010). In Fig. S1f, the feature bands at 1691  
85  $\text{cm}^{-1}$ , 1299  $\text{cm}^{-1}$ , 1198  $\text{cm}^{-1}$  and 919  $\text{cm}^{-1}$  are characteristics of crystalline GA solids  
86 (Ghorai et al., 2014; Cziczo et al., 1997; Wu et al., 2019).

87

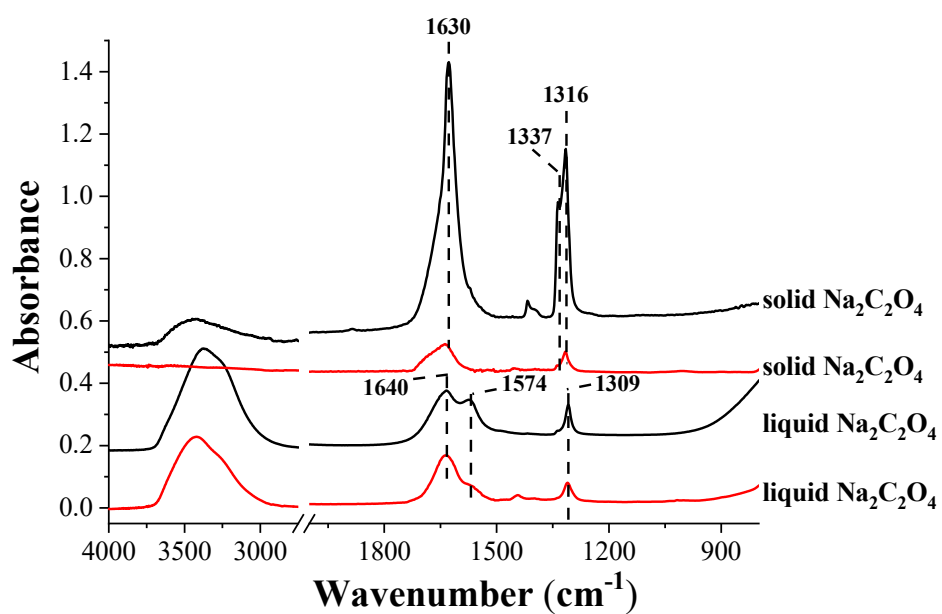

**Figure S4.** IR spectra of solid and liquid  $\text{Na}_2\text{C}_2\text{O}_4$  particles measured by ATR-FTIR in this work (black curves) and from Wang et al. (2019) (red curves).

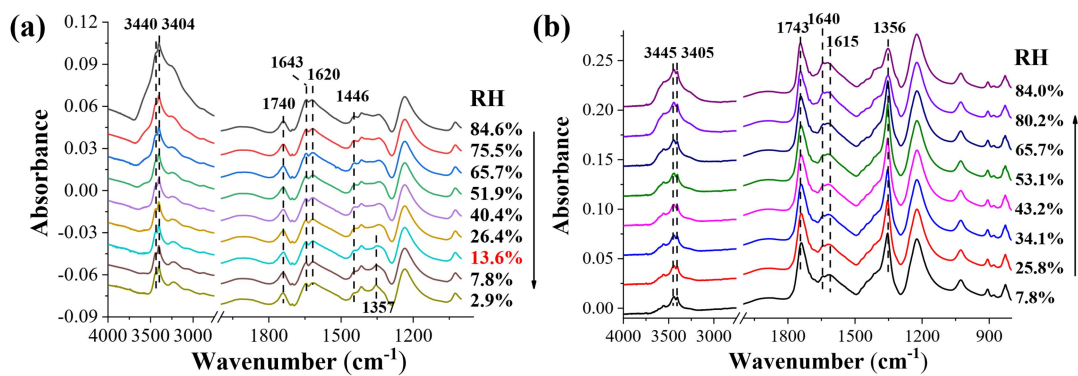

**Figure S5.** IR spectra of 1:1 mixed  $\text{NaNO}_3/\text{OA}$  particles during the dehumidification in vacuum FTIR measurement (a) and during the humidification in ATR-FTIR measurement (b).



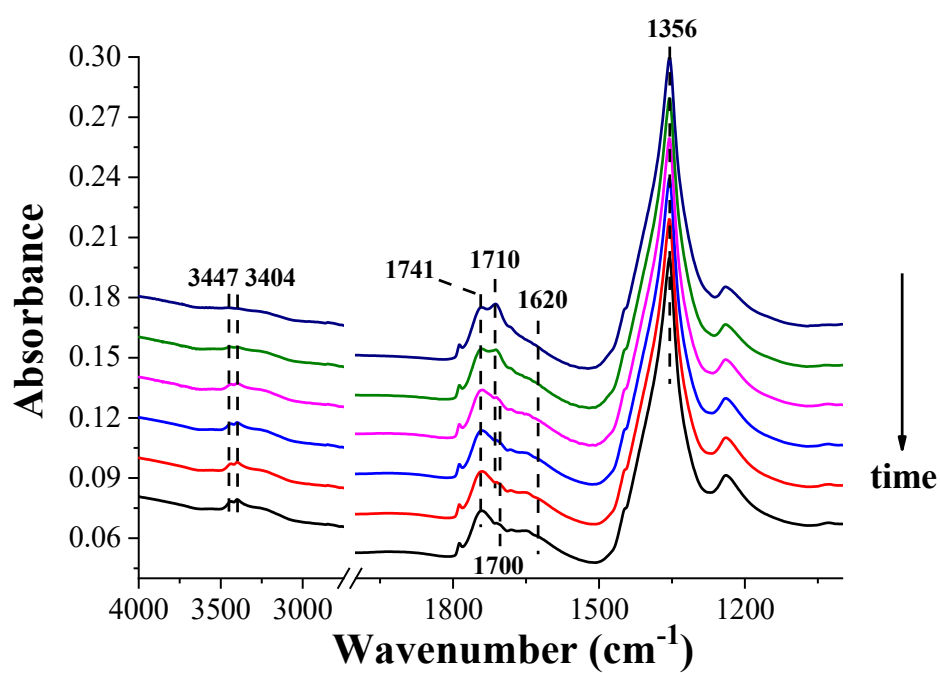

**Figure S6.** IR spectra changes of 3:1 NaNO<sub>3</sub>/OA mixed particles at different time under constant ~ 15% RH.

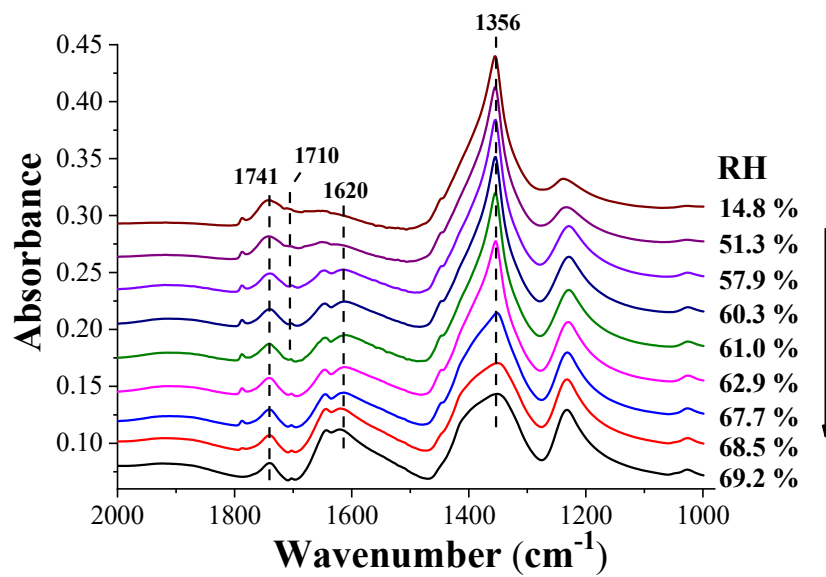

**Figure S7.** IR spectra changes of 3:1 NaNO<sub>3</sub>/OA mixed particles during the shaded period in Fig.

3a.

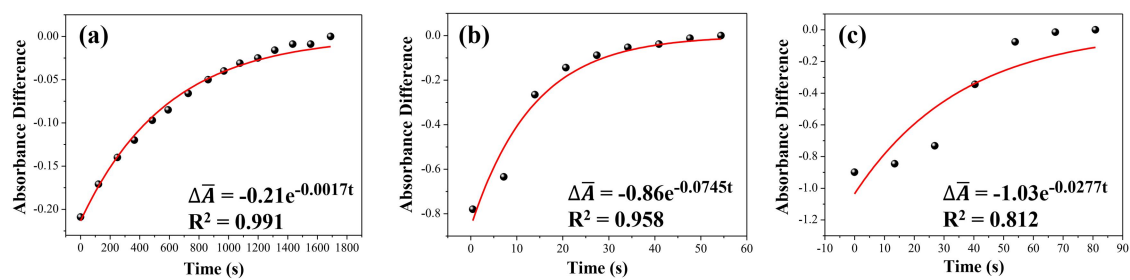

**Figure S8.** Changes in absorbance difference of  $\nu_{\text{as}}(\text{COO}^-)$  band,  $\Delta\bar{A}$ , as a function of initialized reaction time in three RH ranges, i.e., constant  $\sim 15\%$  (a), 14.8-61.0% (b), and 66.2-69.2% (c). The red curves indicate the exponential fitting of absorbance difference data.

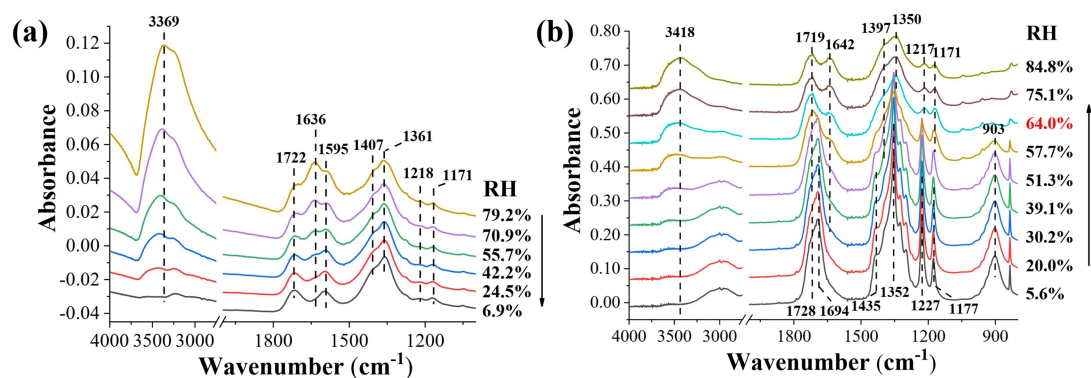

**Figure S9.** IR spectra of 1:1 mixed  $\text{NaNO}_3/\text{MA}$  particles during the dehumidification in vacuum FTIR measurement (a) and during the humidification in ATR-FTIR measurement (b).

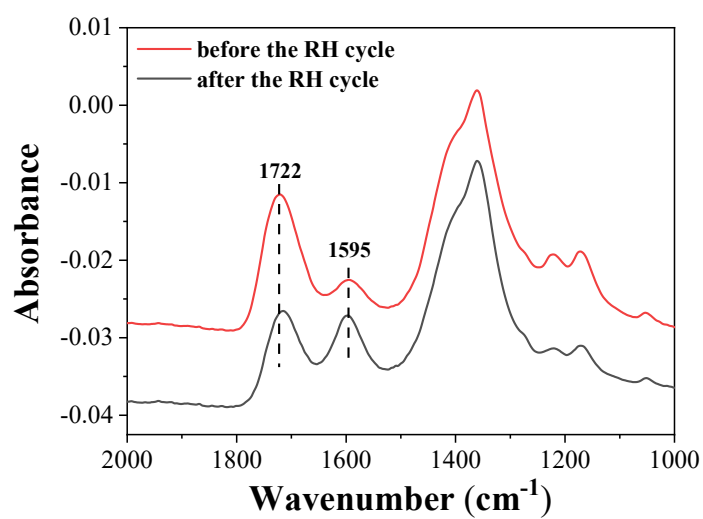

**Figure S10.** IR spectra of 1:1 NaNO<sub>3</sub>/MA mixtures in the range of 2000-1000 cm<sup>-1</sup> before and after the RH cycle.

## Chemical reaction between internally mixed NaCl and MA

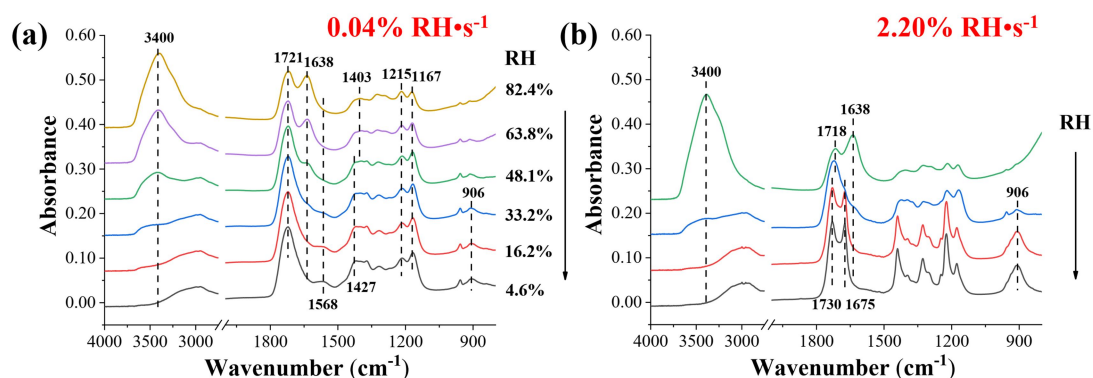

**Figure S11.** IR spectra of 1:1 mixed NaCl/MA particles during the dehumidification with two RH changing rates, i.e.,  $0.04\% \text{ RH} \cdot \text{s}^{-1}$  (a) and  $2.20\% \text{ RH} \cdot \text{s}^{-1}$  (b), in ATR-FTIR measurements.

The chemical reaction between internally mixed NaCl and MA is explored by ATR-FTIR. Fig. S12a shows the IR spectra of 1:1 NaCl/MA mixtures during the dehumidification with the RH changing rate of  $0.04\% \text{ RH} \cdot \text{s}^{-1}$ . When the RH decreases from 82.4% to 4.6%, the red shift of feature band from  $1403 \text{ cm}^{-1}$  to  $1427 \text{ cm}^{-1}$  and the appearance of  $906 \text{ cm}^{-1}$  band illustrate the crystallization of MA (Shao et al., 2017). Nevertheless, the splitting of  $1721 \text{ cm}^{-1}$  band and the shift of feature bands at  $1215$  and  $1167 \text{ cm}^{-1}$ , which will occur during liquid-solid phase transition of MA, cannot be observed, potentially implying the partial crystallization of NaCl/MA mixtures. In Ghorai's study, the submicrometer NaCl/MA mixed particles with mole ratio of 1:1 deposited on  $\text{Si}_3\text{N}_4$  windows did not effloresce upon dehydration (Ghorai et al., 2014). While in Li's work, the supermicrometer 1:1 NaCl/MA mixtures ( $\sim 12\text{-}15 \mu\text{m}$  in diameter at  $\text{RH} = \sim 90\%$ ) deposited on Si substrate would effloresce at  $\sim 32.5\%$  RH (Li et al., 2017). Furthermore, Ling and Chan (2008) also observed the partial crystallization of both  $(\text{NH}_4)_2\text{SO}_4$  and MA for 1:1 mixed particle levitated in electrodynamic balance. These controversial results can be attributed to the substrate

effect, particle size, or trace impurities contained in aqueous droplets (Ma et al., 2021). As RH decreases to  $\sim 33.2\%$ , a new peak located at  $1568\text{ cm}^{-1}$  assigned to  $\nu_{\text{as}}(\text{COO}^-)$  of  $\text{CH}_2(\text{COONa})_2$  appears, suggesting the formation of disodium malonate (Wang et al., 2019; Ma et al., 2013). The disodium salts production demonstrates greater chemical reactivity of NaCl than  $\text{NaNO}_3$  with diacids due to stronger volatility of HCl than  $\text{HNO}_3$ , i.e., lower  $K_{\text{H}}$  value of HCl ( $< 2 \times 10^{-1}\text{ M/atm}$ ) than that of  $\text{HNO}_3$  ( $> 2 \times 10^5\text{ M/atm}$ ) (Laskin et al., 2012). However, the experimental result is inconsistent with the observation by Ma et al. (2013), in which the chloride depletion in NaCl/MA mixtures would not occur in a speedy drying process. They explained that the rapid drying process minimized the HCl release from mixed droplets. Herein, the dehumidification process of NaCl/MA mixtures with a higher RH changing rate of  $2.20\% \text{ RH} \cdot \text{s}^{-1}$  is monitored by ATR-FTIR, as shown in Fig. S12b. It is obvious that no malonate sodium salts are formed upon drying. Meanwhile, the crystallization of mixtures can be clearly distinguished. This is because the high dehumidification rate will cause rapid water evaporation, which leads to lower temperature of droplets and further facilitates the crystallization of particles (Ma et al., 2019). There are two probable causes for no chloride depletion observed in the fast drying process. One is the minimization of  $\text{HNO}_3$  release caused by rapid water evaporation. Another cause is the efflorescence transition of mixed particles at relatively high RH.

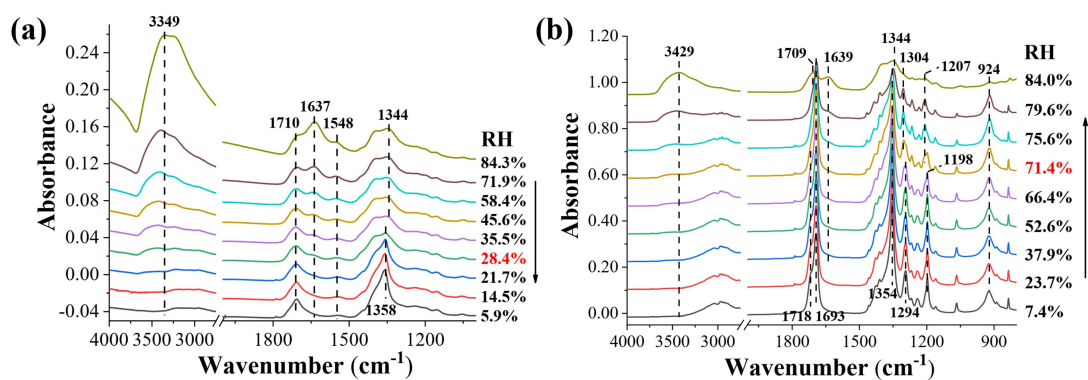

**Figure S12.** IR spectra of 1:1 mixed NaNO<sub>3</sub>/GA particles during the dehumidification in vacuum FTIR measurement (a) and during the humidification in ATR-FTIR measurement (b).



### Calculation method of the water activity $a_w$

The water activity  $a_w$  of aqueous droplets can be determined by Köhler equation:

$$a_w = RH \cdot \exp\left(\frac{-4\sigma_{sol}M_w}{RT \rho_w D_p}\right) \quad (1)$$

where  $\sigma_{sol}$  denotes the surface tension of aqueous droplets, which is suggested to be equal to that of pure water ( $0.072 \text{ J m}^{-2}$ );  $M_w$  is the molecular weight of water ( $\text{kg mol}^{-1}$ );  $R$  is the ideal gas constant ( $\text{J mol}^{-1} \text{ K}^{-1}$ );  $T$  is the temperature (K);  $\rho_w$  is the density of water ( $\text{kg m}^{-3}$ );  $D_p$  is the droplet diameter (m).

## Simulation process for pH changes dependent upon nitrate depletion extent in NaNO<sub>3</sub>/DCAs mixtures

Assuming that thermodynamic equilibrium is reached in 1:1 mixed NaNO<sub>3</sub>/H<sub>2</sub>A (org) aqueous system with an initial concentration C<sub>0</sub> of 0.1 mol/L, two dissociation equilibriums for H<sub>2</sub>A (org) can be established in solution:

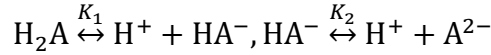

The equilibrium concentration of HA<sup>-</sup> and A<sup>2-</sup>, denoted by [HA<sup>-</sup>] and [A<sup>2-</sup>] respectively, can be expressed as

$$[\text{HA}^-] = \frac{K_1[\text{H}_2\text{A}]}{[\text{H}^+]} \quad (2)$$

$$[\text{A}^{2-}] = \frac{K_2 K_1 [\text{H}_2\text{A}]}{[\text{H}^+]^2} \quad (3)$$

where [H<sub>2</sub>A] and [H<sup>+</sup>] represent the equilibrium concentration of H<sub>2</sub>A and H<sup>+</sup> in solution, respectively; K<sub>1</sub> and K<sub>2</sub> are equal to the primary and secondary dissociation constant of H<sub>2</sub>A, K<sub>a1</sub> and K<sub>a2</sub>, respectively. According to the material balance principle, the following equation can be derived:

$$C_0 = [\text{H}_2\text{A}] + [\text{HA}^-] + [\text{A}^{2-}] \quad (4)$$

Combining the eq. (2) and (3), the eq. (4) can be rewritten as

$$C_0 = \frac{K_1[\text{H}^+] + [\text{H}^+]^2 + K_2 K_1}{[\text{H}^+]^2} \cdot [\text{H}_2\text{A}] \quad (5)$$

Thus, the [HA<sup>-</sup>] and [A<sup>2-</sup>] can be expressed as

$$[\text{HA}^-] = \frac{K_1 C_0 [\text{H}^+]}{K_1[\text{H}^+] + [\text{H}^+]^2 + K_2 K_1} \quad (6)$$

$$[\text{A}^{2-}] = \frac{K_2 K_1 C_0}{K_1[\text{H}^+] + [\text{H}^+]^2 + K_2 K_1} \quad (7)$$

Moreover, another balance between NO<sub>3</sub><sup>-</sup> and HNO<sub>3</sub> (aq) is present in solution:

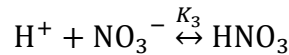

where K<sub>3</sub> is the inverse of the acid dissociation constant of HNO<sub>3</sub>. The equilibrium concentration of NO<sub>3</sub><sup>-</sup> and HNO<sub>3</sub> (aq), [NO<sub>3</sub><sup>-</sup>] and [HNO<sub>3</sub>], can be associated as

$$[\text{HNO}_3] = K_3 [\text{H}^+] [\text{NO}_3^-] \quad (8)$$

The concentration of depleted NO<sub>3</sub><sup>-</sup>, i.e., formed gaseous HNO<sub>3</sub>, is denoted as C<sub>1</sub>, and then the following equation can be derived according to mass balance principle:

$$C_0 = [\text{NO}_3^-] + [\text{HNO}_3] + C_1 \quad (9)$$

Thus, the  $[\text{HNO}_3]$  can be rewritten by combining eq. (8) and (9):

$$[\text{HNO}_3] = \frac{K_3[\text{H}^+](C_0 - C_1)}{K_3[\text{H}^+] + 1} \quad (10)$$

On the basis of the  $\text{H}^+$  ion conservation, the following equation can be derived:

$$[\text{H}^+] = [\text{H}_3\text{O}^+] + [\text{HA}^-] + 2[\text{A}^{2-}] - [\text{HNO}_3] - C_1 \quad (11)$$

Then, the relation between  $C_1$  and  $[\text{H}^+]$  can be determined by combining eq. (6), (7) and (10) into eq. (11):

$$C_1 = (K_3[\text{H}^+] + 1) \cdot \left( \frac{K_w}{[\text{H}^+]} + \frac{K_1 C_0 [\text{H}^+] + 2K_2 K_1 C_0}{K_1 [\text{H}^+] + [\text{H}^+]^2 + K_2 K_1} - [\text{H}^+] - \frac{K_3 C_0 [\text{H}^+]}{K_3 [\text{H}^+] + 1} \right) \quad (12)$$

The  $K_1$ ,  $K_2$  and  $K_3$  values for different acids are listed in Table 2 in the text. Thus, the  $C_1$  values can be determined with changing  $[\text{H}^+]$ , i.e., the different droplet pH according to  $\text{pH} = -\log_{10} [\text{H}^+]$ . Note that the defined pH here is a free- $\text{H}^+$  approximation of pH on a molality basis, as indicated by Pye et al. (2020). The nitrate depletion fraction is determined by the ratio of depleted  $[\text{NO}_3^-]$  ( $C_1$ ) to the initial concentration of  $\text{NO}_3^-$  ( $C_0 = 0.1 \text{ mol/L}$ ).

## References

- Cziczo, D. J., Nowak, J. B., Hu, J. H., and Abbatt, J. P. D.: Infrared spectroscopy of model tropospheric aerosols as a function of relative humidity: Observation of deliquescence and crystallization, *J. Geophys. Res.*, 102, 18843-18850, <https://doi.org/10.1029/97jd01361>, 1997.
- Ghorai, S., Wang, B. B., Tivanski, A., and Laskin, A.: Hygroscopic properties of internally mixed particles composed of NaCl and water-soluble organic acids, *Environ. Sci. Technol.*, 48, 2234-2241, <https://doi.org/10.1021/es404727u>, 2014.
- Laskin, A., Moffet, R. C., Gilles, M. K., Fast, J. D., Zaveri, R. A., Wang, B. B., Nigge, P., and Shutthanandan, J.: Tropospheric chemistry of internally mixed sea salt and organic particles: Surprising reactivity of NaCl with weak organic acids, *J. Geophys. Res.-Atmos.*, 117, D15302, <https://doi.org/10.1029/2012jd017743>, 2012.
- Li, X., Gupta, D., Lee, J., Park, G., and Ro, C.-U.: Real-time investigation of chemical compositions and hygroscopic properties of aerosols generated from NaCl and malonic acid mixture solutions using in situ Raman microspectrometry, *Environ. Sci. Technol.*, 51, 263-270, <https://doi.org/10.1021/acs.est.6b04356>, 2017.
- Ling, T. Y., and Chan, C. K.: Partial crystallization and deliquescence of particles containing ammonium sulfate and dicarboxylic acids, *J. Geophys. Res.-Atmos.*, 113, D14205, <https://doi.org/10.1029/2008jd009779>, 2008.
- Liu, Y., Yang, Z. W., Desyaterik, Y., Gassman, P. L., Wang, H., and Laskin, A.: Hygroscopic behavior of substrate-deposited particles studied by micro-FT-IR spectroscopy and complementary methods of

particle analysis, *Anal. Chem.*, 80, 633-642, <https://doi.org/10.1021/ac701638r>, 2008.

Ma, Q. X., Ma, J. Z., Liu, C., Lai, C. Y., and He, H.: Laboratory study on the hygroscopic behavior of external and internal C<sub>2</sub>–C<sub>4</sub> dicarboxylic acid–NaCl mixtures, *Environ. Sci. Technol.*, 47, 10381-10388, <https://doi.org/10.1021/es4023267>, 2013.

Ma, S. S., Yang, W., Zheng, C. M., Pang, S. F., and Zhang, Y. H.: Subsecond measurements on aerosols: From hygroscopic growth factors to efflorescence kinetics, *Atmos. Environ.*, 210, 177-185, <https://doi.org/10.1016/j.atmosenv.2019.04.049>, 2019.

Ma, S. S., Pang, S. F., Li, J., and Zhang, Y. H.: A review of efflorescence kinetics studies on atmospherically relevant particles, *Chemosphere*, 277, 130320, <https://doi.org/10.1016/j.chemosphere.2021.130320>, 2021.

Marculli, C., Luo, B., and Peter, T.: Mixing of the organic aerosol fractions: Liquids as the thermodynamically stable phases, *J. Phys. Chem. A*, 108, 2216-2224, <https://doi.org/10.1021/jp036080l>, 2004.

Peng, C. G., Chan, M. N., and Chan, C. K.: The hygroscopic properties of dicarboxylic and multifunctional acids: Measurements and UNIFAC predictions, *Environ. Sci. Technol.*, 35, 4495-4501, <https://doi.org/10.1021/es0107531>, 2001.

Pope, F. D., Dennis-Smith, B. J., Griffiths, P. T., Clegg, S. L., and Cox, R. A.: Studies of single aerosol particles containing malonic acid, glutaric acid, and their mixtures with sodium chloride. I. Hygroscopic growth, *J. Phys. Chem. A*, 114, 5335-5341, <https://doi.org/10.1021/jp100059k>, 2010.

Pye, H. O. T., Nenes, A., Alexander, B., Ault, A. P., Barth, M. C., Clegg, S. L., Collett Jr, J. L., Fahey, K. M., Hennigan, C. J., Herrmann, H., Kanakidou, M., Kelly, J. T., Ku, I. T., McNeill, V. F., Riemer, N., Schaefer, T., Shi, G., Tilgner, A., Walker, J. T., Wang, T., Weber, R., Xing, J., Zaveri, R. A., and Zuend, A.: The acidity of atmospheric particles and clouds, *Atmos. Chem. Phys.*, 20, 4809-4888, <https://doi.org/10.5194/acp-20-4809-2020>, 2020.

Redington, R. L., and Redington, T. E.: Infrared matrix-isolation spectra of monomeric oxalic acid, *J. Mol. Struct.*, 48, 165-176, [https://doi.org/10.1016/0022-2860\(78\)80019-2](https://doi.org/10.1016/0022-2860(78)80019-2), 1978.

Shao, X., Zhang, Y., Pang, S. F., and Zhang, Y. H.: Vacuum FTIR observation on hygroscopic properties and phase transition of malonic acid aerosols, *Chem. Phys.*, 483-484, 7-11, <https://doi.org/10.1016/j.chemphys.2016.11.001>, 2017.

Shao, X., Wu, F. M., Yang, H., Pang, S. F., and Zhang, Y. H.: Observing HNO<sub>3</sub> release dependent upon metal complexes in malonic acid/nitrate droplets, *Spectrochim. Acta A*, 201, 399-404, <https://doi.org/10.1016/j.saa.2018.05.026>, 2018.

Stace, B. C., and Oraltatmanee, C.: Infrared and Raman spectra of gaseous oxalic acid, *J. Mol. Struct.*, 18, 339-342, [https://doi.org/10.1016/0022-2860\(73\)85238-X](https://doi.org/10.1016/0022-2860(73)85238-X), 1973.

Tang, I. N., and Fung, K. H.: Hydration and Raman scattering studies of levitated microparticles: Ba(NO<sub>3</sub>)<sub>2</sub>, Sr(NO<sub>3</sub>)<sub>2</sub>, and Ca(NO<sub>3</sub>)<sub>2</sub>, *J. Chem. Phys.*, 106, 1653-1660, <https://doi.org/10.1063/1.473318>, 1997.

Wang, N., Jing, B., Wang, P., Wang, Z., Li, J. R., Pang, S. F., Zhang, Y. H., and Ge, M. F.: Hygroscopicity and compositional evolution of atmospheric aerosols containing water-soluble carboxylic acid salts and ammonium sulfate: Influence of ammonium depletion, *Environ. Sci. Technol.*, 53, 6225-6234, <https://doi.org/10.1021/acs.est.8b07052>, 2019.

Wang, X. W., Jing, B., Tan, F., Ma, J. B., Zhang, Y. H., and Ge, M. F.: Hygroscopic behavior and chemical composition evolution of internally mixed aerosols composed of oxalic acid and ammonium sulfate, *Atmos. Chem. Phys.*, 17, 12797-12812, <https://doi.org/10.5194/acp-17-12797-2017>, 2017.

272 Wu, F. M., Wang, N., Pang, S. F., and Zhang, Y. H.: Hygroscopic behavior and fractional crystallization  
273 of mixed  $(\text{NH}_4)_2\text{SO}_4$ /glutaric acid aerosols by vacuum FTIR, *Spectrochim. Acta A*, 208, 255-261,  
274 <https://doi.org/10.1016/j.saa.2018.10.010>, 2019.

275 Yeung, M. C., Ling, T. Y., and Chan, C. K.: Effects of the polymorphic transformation of glutaric acid  
276 particles on their deliquescence and hygroscopic properties, *J. Phys. Chem. A*, 114, 898-903,  
277 <https://doi.org/10.1021/jp908250v>, 2010.

278 Zhang, Q. N., Zhang, Y., Cai, C., Guo, Y. C., Reid, J. P., and Zhang, Y. H.: In situ observation on the  
279 dynamic process of evaporation and crystallization of sodium nitrate droplets on a ZnSe substrate by  
280 FTIR-ATR, *J. Phys. Chem. A*, 118, 2728-2737, <https://doi.org/10.1021/jp412073c>, 2014.
